# Supplementary material for: Antimicrobial Efficacy of 7-Hydroxyflavone Derived from Amycolatopsis sp. HSN-02 and Its Biocontrol Potential on Cercospora Leaf Spot Disease in Tomato Plants
Source: MDPI journal article supplement (doi:10.3390/antibiotics12071175), 2023-07-11
Supplement: s1 [file s1]

# Antimicrobial Efficacy of 7-Hydroxyflavone Derived from *Amycolatopsis* sp. HSN-02 and Its Biocontrol Potential on *Cercospora* Leaf Spot Disease in Tomato Plants

Halaswamy Hire Math <sup>1</sup>, Raju Suresh Kumar <sup>2</sup>, Bidhayak Chakraborty <sup>1</sup>, Abdulrahman I. Almansour <sup>2</sup>, Karthikeyan Perumal <sup>3</sup>, Girish Babu Kantli <sup>4</sup> and Sreenivasa Nayaka <sup>1,\*</sup>

<sup>1</sup> P.G. Department of Studies in Botany, Karnatak University, Dharwad 580003, Karnataka, India; hmhalaswamy2063@gmail.com (H.H.M.); pallabchakraborty3@gmail.com (B.C.)

<sup>2</sup> Department of Chemistry, College of Science, King Saud University, P.O. Box 2455, Riyadh 11451, Saudi Arabia; sraju@ksu.edu.sa (R.S.K.); almansour@ksu.edu.sa (A.I.A.)

<sup>3</sup> Department of Chemistry and Biochemistry, The Ohio State University, 151 W. Woodruff Ave, Columbus, OH 43210, USA; perumal.11@osu.edu

<sup>4</sup> Department of Life Sciences, PIAS, Parul University, Vadodara 391760, Gujarat, India; gibugiri@gmail.com

\* Correspondence: sreenivasankud@gmail.com

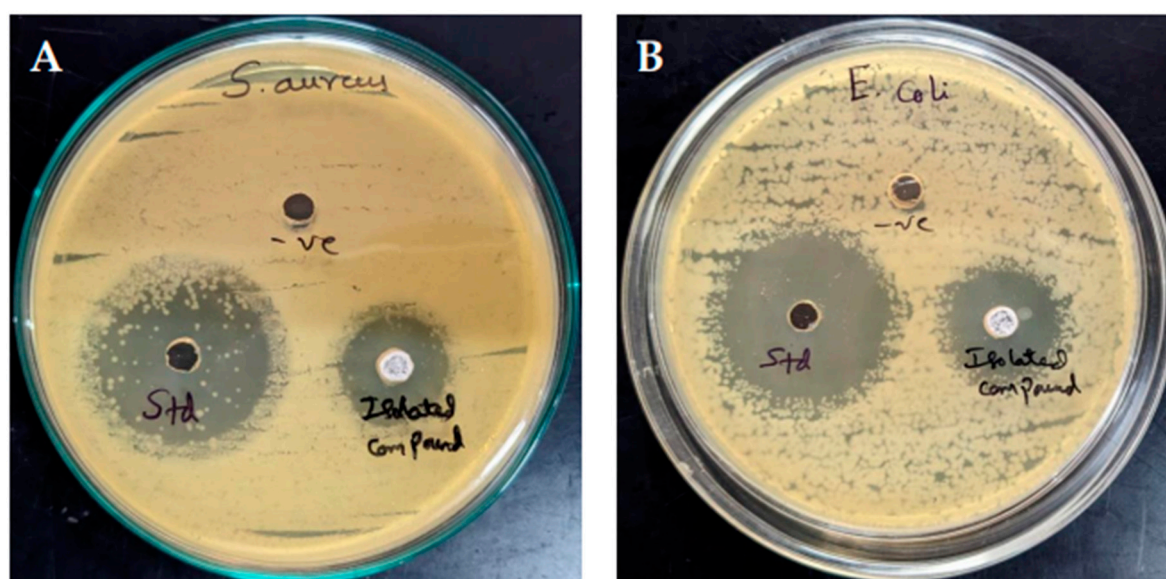

**Figure S1.** Antibacterial activity of standard drug and purified compound: (A) *S. aureus* and (B) *E. coli*.

**Table S1.** Detailed HRMS analysis of SC medium without the inoculation of *Amycolatopsis* sp. HSN-02.

| Compound | Retention Time | Adduct Ion         | <i>m/z</i> Value |
|----------|----------------|--------------------|------------------|
| 1        | 7.88           | [M+H] <sup>+</sup> | 219.1698         |
| 2        | 10.96          | [M+H] <sup>+</sup> | 284.3261         |
| 3        | 11.36          | [M+H] <sup>+</sup> | 149.0255         |
| 4        | 11.51          | [M+H] <sup>+</sup> | 512.3919         |
| 5        | 11.87          | [M+H] <sup>+</sup> | 540.4945         |
| 6        | 12.7           | [M+H] <sup>+</sup> | 881.6713         |

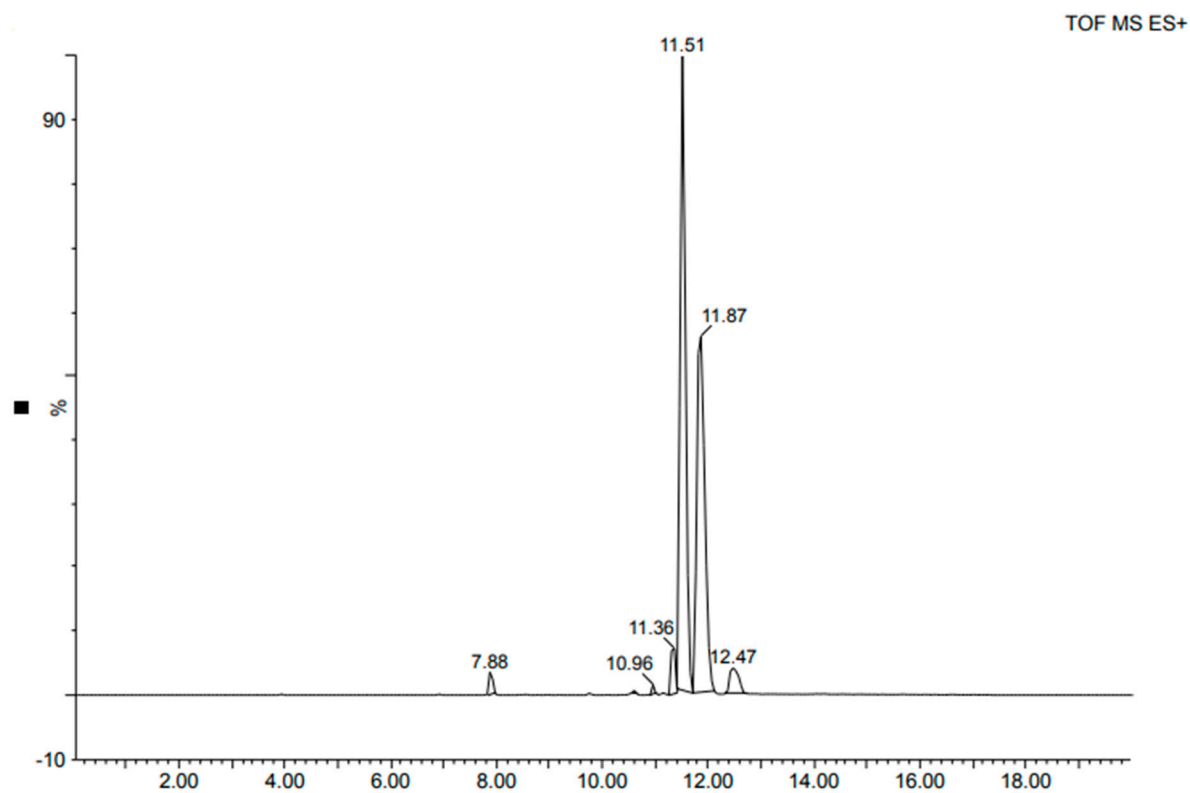

**Figure S2.** HRMS chromatogram of SC medium without the inoculation of *Amycolatopsis* sp. HSN-02.
